# Supplementary material for: Contribution of the elevated thrombosis risk of males to the excess male mortality observed in COVID-19: an observational study
Source: HighWire-hosted journal article supplement (doi:10.1136/bmjopen-2021-051624), 2022-02-01
Supplement: bmjopen-2021-051624supp001_data_supplement.pdf [file bmjopen-2021-051624supp001_data_supplement.pdf]

**Does the elevated thrombosis risk of males relative to females help account for the excess male mortality observed in Covid-19? An observational study**  
**Supplementary Materials**

**I. ICD-10 Codes Used to Define Thrombosis Conditions During Hospital Stay**

**Table e1. All ICD-10 Codes Used for Thrombosis Definition** (limited to first 5 digits)

**II. Comorbid Condition Summary**

**Table e2 Prevalence of Comorbid Conditions in the Full Study Population**

**Table e3. Prevalence of Comorbid Conditions in the Subpopulation with D-dimer and CRP Values**

**III. R codes for mediation analysis**

## I. ICD-10 Codes Used to Define Thrombosis Conditions During Hospital Stay

**Table e1. All ICD-10 Codes Used for Thrombosis Definition (limited to first 5 digits)**

| Thrombosis groups                            | ICD-10 codes                                                                                                                                                                                                                                                                                                                                                                                                                                         |
|----------------------------------------------|------------------------------------------------------------------------------------------------------------------------------------------------------------------------------------------------------------------------------------------------------------------------------------------------------------------------------------------------------------------------------------------------------------------------------------------------------|
| Myocardial infarction                        | I2101, I2102, I2109, I2111, I2119, I2121, I2129, I213, I214, I219, I21A1, I21A9, I220, I221, I222, I228, I229                                                                                                                                                                                                                                                                                                                                        |
| Peripheral arterial occlusions               | E0852, E0952, E1052, E1152, E1352, I7401, I7409, I7410, I7411, I7419, I742, I743, I744, I745, I748, I749, I7501, I7502, I7581, I7589, I96                                                                                                                                                                                                                                                                                                            |
| Stroke                                       | I6300, I6301, I6302, I6303, I6309, I6310, I6311, I6312, I6313, I6319, I6320, I6321, I6322, I6323, I6329, I6330, I6331, I6332, I6333, I6334, I6339, I6340, I6341, I6342, I6343, I6344, I6349, I6350, I6351, I6352, I6353, I6354, I6359, I636, I638, I6381, I6389, I639, I601, I6502, I6503, I6509, I651, I6521, I6522, I6523, I6529, I658, I659, I6601, I6602, I6603, I6609, I6611, I6612, I6613, I6619, I6621, I6622, I6623, I6629, I663, I668, I669 |
| Deep venous thrombosis and pulmonary embolus | I2602, I2609, I2692, I2693, I2694, I2699, I8000, I8001, I8002, I8003, I8010, I8011, I8012, I8013, I8020, I8021, I8022, I8023, I8024, I8025, I8029, I803, I808, I809, I81, I820, I821, I8221, I8222, I8229, I823, I8240, I8241, I8242, I8243, I8244, I8245, I8246, I8249, I824Y, I824Z, I825Y, I825Z, I8260, I8261, I8262, I8271, I8281, I8289, I8290, I82A1, I82B1, I82C1                                                                            |

## II. Comorbid Condition Summary

**Table e2 Prevalence of Comorbid Conditions in the Full Study Population**

| Sex                                | Female |        | Male   |        |
|------------------------------------|--------|--------|--------|--------|
|                                    | No     | Yes    | No     | Yes    |
| Thrombotic condition               |        |        |        |        |
| Myocardial infarction              | 3.67%  | 39.63% | 6.95%  | 42.69% |
| Congestive heart failure           | 14.28% | 33.27% | 17.04% | 31.09% |
| Peripheral vascular disease        | 4.44%  | 10.83% | 6.76%  | 14.82% |
| Cerebrovascular disease            | 2.47%  | 23.65% | 2.8%   | 23.02% |
| Dementia                           | 8.68%  | 16.79% | 7.43%  | 10.54% |
| Chronic pulmonary disease          | 28.34% | 32.03% | 22.95% | 25.99% |
| Rheumatic disease                  | 4.64%  | 6.34%  | 1.82%  | 1.64%  |
| Peptic ulcer disease               | 0.64%  | 1.55%  | 0.82%  | 1.62%  |
| Mild liver disease                 | 5.81%  | 7.37%  | 7.29%  | 8.38%  |
| Diabetes without complication      | 29.93% | 37.09% | 34.1%  | 38.13% |
| Diabetes with complication         | 14.62% | 25.57% | 17.9%  | 25.92% |
| Hemiplegia or paraplegia           | 0.54%  | 3.7%   | 0.86%  | 4.44%  |
| Renal disease                      | 16.93% | 30.26% | 23.47% | 33.45% |
| Malignancy                         | 5.67%  | 8.38%  | 6.82%  | 9.67%  |
| Moderate severe liver disease      | 0.71%  | 1.5%   | 1.13%  | 1.88%  |
| Metastatic solid tumor             | 1.21%  | 2.07%  | 1.41%  | 2.09%  |
| Acquired immunodeficiency syndrome | 1%     | 4.07%  | 1.28%  | 4.23%  |

**Table e3. Prevalence of Comorbid Conditions in the Subpopulation with D-dimer and CRP Values**

| Sex                   | Female |     | Male  |        |
|-----------------------|--------|-----|-------|--------|
|                       | No     | Yes | No    | Yes    |
| Thrombotic Condition  |        |     |       |        |
| Myocardial infarction | 3.88%  | 36% | 6.87% | 39.61% |

|                                    |        |        |        |        |
|------------------------------------|--------|--------|--------|--------|
| Congestive heart failure           | 14.37% | 32.72% | 16.29% | 29.21% |
| Peripheral vascular disease        | 4.56%  | 9.65%  | 6.25%  | 14.2%  |
| Cerebrovascular disease            | 2.24%  | 20.83% | 2.39%  | 19.82% |
| Dementia                           | 8.21%  | 14.41% | 6.62%  | 9.78%  |
| Chronic pulmonary disease          | 30.59% | 33.29% | 23.34% | 27.12% |
| Rheumatic disease                  | 5.3%   | 6.37%  | 1.75%  | 1.54%  |
| Peptic ulcer disease               | 0.63%  | 1.38%  | 0.65%  | 1.54%  |
| Mild liver disease                 | 6.61%  | 7.04%  | 7.11%  | 8.21%  |
| Diabetes without complication      | 34.19% | 38.71% | 36.25% | 38.83% |
| Diabetes with complication         | 15.28% | 25.01% | 17.16% | 24.3%  |
| Hemiplegia or paraplegia           | 0.45%  | 3.09%  | 0.66%  | 3.96%  |
| Renal disease                      | 17.32% | 29.15% | 22.21% | 32.97% |
| Malignancy                         | 5.66%  | 8.13%  | 6.26%  | 8.73%  |
| Moderate severe liver disease      | 0.57%  | 1.09%  | 0.84%  | 1.47%  |
| Metastatic solid tumor             | 1%     | 1.76%  | 1.11%  | 1.73%  |
| Acquired immunodeficiency syndrome | 1.19%  | 4.47%  | 1.34%  | 4.19%  |

### III. R codes for mediation analysis

#### Create functions for mediation analysis

```
library(dplyr); library(tidyr); library(mediation)

#### Mediation Analysis Pipeline ####
### Step 1: outcome and gender ###
med_step.1 <- function(cohort, outcome, adj_vars, tab_row_names){
  unadj_formula = as.formula(paste(outcome, '~', 'gender'))
  adj_formula = as.formula(paste(outcome, '~', paste0(c('gender', adj_vars), c
collapse= ' + ')))

  outcome_gender_tab = table(cohort[, outcome], cohort$gender) %>% t()
  gender.prop_within_died = paste(round(100*(prop.table(outcome_gender_tab,2)
[,2]),2), "%", sep = "")
  died.prop_within_gender = paste(round(100*(prop.table(outcome_gender_tab,1)
[,2]),2), "%", sep = "")
  N_gender_overall = table(cohort$gender)

  outcome_main_unadj = glm(unadj_formula, data = cohort, family = binomial)
  outcome_gender_unadj = summary(outcome_main_unadj)$coefficient["gendermale"
,c(1,4)]
  outcome_gender_unadj_ci = confint(outcome_main_unadj)["gendermale",] %>% exp()

  outcome_main = glm(adj_formula, data = cohort, family = binomial)
  outcome_gender_adj = summary(outcome_main)$coefficient["gendermale",c(1,4)]
  outcome_gender_adj_ci = confint(outcome_main)["gendermale",] %>% exp()

  main_step1_num = cbind(N_gender_overall, outcome_gender_tab, gender.prop_wi
thin_died, died.prop_within_gender) %>% t() %>% as.data.frame()
```

```

    rownames(main_step1_num) = tab_row_names
    main_step1_unadj = paste(round(exp(outcome_gender_unadj[1]), 2), " [" , round
d(outcome_gender_unadj_ci[1],2), " , " ,
        round(outcome_gender_unadj_ci[2],2), " ] p-value ="
, signif(outcome_gender_unadj[2], 3), sep = "")
    main_step1_adj = paste(round(exp(outcome_gender_adj[1]), 2), " [" , round(ou
tcome_gender_adj_ci[1],2), " , " ,
        round(outcome_gender_adj_ci[2],2), " ] p-value =", si
gnif(outcome_gender_adj[2], 3), sep = "")
    return(rslt.list = list(tab = main_step1_num, unadj = main_step1_unadj, adj
= main_step1_adj))
}

#### Step 2: mediator and gender ####
med_step.2 <- function(cohort, coag_def, adj_vars, tab_row_names){
  unadj_formula = as.formula(paste(coag_def, '~', 'gender'))
  adj_formula = as.formula(paste(coag_def, '~', paste0(c('gender', adj_vars),
collapse=' + ')))

  hyper_coag_gender_tab = table(cohort[,coag_def], cohort$gender) %>% t()
  gender.prop_within_coag = paste(round(100*(prop.table(hyper_coag_gender_tab
,2)[,2]),2), "%", sep = "")
  coag.prop_within_gender = paste(round(100*(prop.table(hyper_coag_gender_tab
,1)[,2]),2), "%", sep = "")
  N_gender = table(cohort$gender)

  mediator_main_unadj = glm(unadj_formula, data = cohort, family = binomial)
  gender_unadj = summary(mediator_main_unadj)$coefficient["gendermale",c(1,4)
]
  gender_unadj_ci = confint(mediator_main_unadj)["gendermale",] %>% exp()

  mediator_main = glm(adj_formula, data = cohort, family = binomial)
  gender_adj = summary(mediator_main)$coefficient["gendermale",c(1,4)]
  gender_adj_ci = confint(mediator_main)["gendermale",] %>% exp()

  main_step2_num = cbind(N_gender, hyper_coag_gender_tab, gender.prop_within_
coag, coag.prop_within_gender) %>% t() %>% as.data.frame()
  rownames(main_step2_num) = tab_row_names
  main_step2_unadj = paste(round(exp(gender_unadj[1]), 2), " [" , round(gender
_unadj_ci[1],2), " , " ,
        round(gender_unadj_ci[2],2), " ] p-value =", signif
(gender_unadj[2], 3), sep = "")
  main_step2_adj = paste(round(exp(gender_adj[1]), 2), " [" , round(gender_adj
_ci[1],2), " , " ,
        round(gender_adj_ci[2],2), " ] p-value =", signif(gen
der_adj[2], 3), sep = "")
  return(rslt.list = list(tab = main_step2_num, unadj = main_step2_unadj, adj
= main_step2_adj, mediator_model = mediator_main))
}

```

```

med_step.2.cont <- function(cohort, mediator, adj_vars){
  unadj_formula = as.formula(paste(mediator, '~', 'gender'))
  adj_formula = as.formula(paste(mediator, '~', paste0(c('gender', adj_vars),
collapse=' + ')))

  mediator_main_unadj = glm(unadj_formula, data = cohort, family = gaussian(link = "log"))
  gender_unadj = summary(mediator_main_unadj)$coefficient["gendermale",c(1,4)]
}
gender_unadj_ci = confint(mediator_main_unadj)["gendermale",]

mediator_main = glm(adj_formula, data = cohort, family = gaussian(link = "log"))
gender_adj = summary(mediator_main)$coefficient["gendermale",c(1,4)]
gender_adj_ci = confint(mediator_main)["gendermale",]

main_step2_unadj = paste(round(gender_unadj[1], 2), " [", round(gender_unadj_ci[1],2), ", ",
round(gender_unadj_ci[2],2), "] p-value =", signif(gender_unadj[2], 3), sep = "")
main_step2_adj = paste(round(gender_adj[1], 2), " [", round(gender_adj_ci[1],2), ", ",
round(gender_adj_ci[2],2), "] p-value =", signif(gender_adj[2], 3), sep = "")
return(rsult.list = list(unadj = main_step2_unadj, adj = main_step2_adj, mediator_model = mediator_main))
}

### Step 3.1: outcome and mediator + gender ###
med_step.3 <- function(cohort, outcome, coag_def, adj_vars, tab_row_names){
  unadj_formula = as.formula(paste(outcome, '~', coag_def))
  adj_formula = as.formula(paste(outcome, '~', paste0(c('gender', coag_def, adj_vars), collapse=' + ')))

  outcome_hcoag_tab = table(cohort[, outcome], cohort[,coag_def]) %>% t()
  hyper_coag.prop_within_outcome = paste(round(100*(prop.table(outcome_hcoag_tab,2)[,2]),2), "%", sep = "")
  outcome.prop_within_hyper_coag = paste(round(100*(prop.table(outcome_hcoag_tab,1)[,2]),2), "%", sep = "")
  N_hyper_coag = table(cohort[,coag_def])
  # N_outcome = table(cohort$died_or_vent)

  response_main_unadj = glm(unadj_formula, data = cohort, family = binomial)
  hyper_coag_unadj = summary(response_main_unadj)$coefficient[coag_def,c(1,4)]
}
hyper_coag_unadj_ci = confint(response_main_unadj)[coag_def,] %>% exp()

response_main = glm(adj_formula, data = cohort, family = binomial)
hyper_coag_adj = summary(response_main)$coefficient[coag_def,c(1,4)]
hyper_coag_adj_ci = confint(response_main)[coag_def,] %>% exp()

```

```

response_gender_adj = summary(response_main)$coefficient["gendermale",c(1,4
)]
response_gender_adj_ci = confint(response_main)["gendermale",] %>% exp()

main_step3_num = cbind(N_hyper_coag, outcome_hcoag_tab, hyper_coag.prop_wit
hin_outcome, outcome.prop_within_hyper_coag) %>% t() %>% as.data.frame()
colnames(main_step3_num) = c("No hypercoagulation", "Had hypercoagulation")
rownames(main_step3_num) = tab_row_names
main_step3_unadj = paste(round(exp(hyper_coag_unadj[1]), 2), " [" , round(hy
per_coag_unadj_ci[1],2), " , " ,
round(hyper_coag_unadj_ci[2],2), " ] p-value =", si
gnif(hyper_coag_unadj[2], 3), sep = "")
main_step3_adj = paste(round(exp(hyper_coag_adj[1]), 2), " [" , round(hyper
coag_adj_ci[1],2), " , " ,
round(hyper_coag_adj_ci[2],2), " ] p-value =", signif
(hyper_coag_adj[2], 3), sep = "")
main_step3_gender_adj = paste(round(exp(response_gender_adj[1]), 2), " [" ,
round(response_gender_adj_ci[1],2), " , " ,
round(response_gender_adj_ci[2],2), " ] p-valu
e =", signif(response_gender_adj[2], 3), sep = "")
return(rslt.list = list(tab = main_step3_num, unadj = main_step3_unadj, adj
= main_step3_adj,
gender_adj = main_step3_gender_adj, response_model
= response_main))
}

### Step 3.2: Proportion Mediated ####
mediation.pipeline <- function(mediator_model, response_model, mediator_name)
{
  set.seed(12345)
  med.fit = mediate(mediator_model, response_model, treat = "gender", mediato
r = mediator_name,
control.value = "female", treat.value = "male", robustSE
= TRUE, sims = 1000) # , covariates = list(age_gt_65 = 1)
prop.est = as.character(signif(c(c(summary(med.fit)$n.avg, summary(med.fit)
)n.avg.ci)*100, summary(med.fit)$n.avg.p), 3))
prop.est.fmt = paste(prop.est[1], " [" , prop.est[2], " , " , prop.est[3], " ]
p-value =", prop.est[4], sep = "")
return(rslt.list = list(fit = med.fit, proportion = prop.est.fmt))
}

Implement Mediation Analysis
## df_main_cohort_comorb is the analytic dataset we created, which contains a
ge, gender, deceased or not, hyper coagulation/thrombosis, and individual cha
rlson comorbidities.
### Step1: outcome and gender ####
main.step1.rslt_d = med_step.1(df_main_cohort_comorb, "deceased", c("age_gt_6
5", colnames(df_comorb_analytic)[c(3,4,6:18)]), tab_row_names)

```

```
### Step2: hcoag and gender ####
main.step2.rslt = med_step.2(df_main_cohort_comorb, "hyper_coag", c("age_gt_65", colnames(df_comorb_analytic)[c(3,4,6:18)]), tab_row_names)

### Step3.1: outcome and hcoag + gender ####
main.step3.rslt_d = med_step.3(df_main_cohort_comorb, "deceased", "hyper_coag", c("age_gt_65", colnames(df_comorb_analytic)[c(3,4,6:18)]), tab_row_names)

### Step3.2: Proportion Mediated ####
mediator_name = "hyper_coag"
main.med.rslt_d = mediation.pipeline(main.step2.rslt$mediator_model, main.step3.rslt_d$response_model, mediator_name)
main.med.rslt_d$proportion

## [1] "12.1 [9.44, 15.3] p-value =0"
```
